32 accumulation and its deleterious effects on bones. Our findings provide a new CEP  
33 experimental model and a potential repurposed therapeutic.

34 **Keywords:** Acitretin/bone/drug screening/protein aggregation/zebrafish

## 35 INTRODUCTION

36 Porphyrias are a group of inherited disorders due to defects in the heme biosynthetic  
37 pathway<sup>1,2</sup>. One such example is congenital erythropoietic porphyria (CEP), most commonly  
38 caused by loss of function mutation in uroporphyrinogen III synthase (UROS; Fig.S1), the  
39 enzyme that catalyzes the third step of the heme biosynthetic pathway<sup>1,3</sup>. CEP is rare, with ~250  
40 cases reported to date<sup>4,5</sup>. It is autosomal recessive, and associated with reduced UROS activity  
41 (5% of normal) and consequent accumulation of uro/coproporphyrin-I (uro/copro-I) in bone  
42 marrow, erythrocytes, plasma, and increased uro/copro-I excretion in urine and stool<sup>1,3,5,6</sup>. CEP  
43 is characterized by severe photosensitivity, with skin fragility and blistering of sun-exposed  
44 areas<sup>1,5,6</sup>. Scarring due to secondary skin infections and bone resorption contribute to  
45 disfigurement of light-exposed areas<sup>3</sup>. Other clinical manifestations of this multisystem disease  
46 include chronic ulcerative keratitis, hemolysis, which may require repeated blood transfusions in  
47 severe cases, nonimmune hydrops fetalis, red urine since birth, erythrodontia and  
48 osteodystrophy<sup>1,3,6,7</sup>. Currently, there is no specific pharmacological treatment for CEP, with  
49 interventions being life-style-related (e.g. avoidance of sun) or complex procedures, including  
50 bone marrow transplantation<sup>3,8,9</sup>.

51 Fluorescent porphyrin accumulation in porphyria causes organelle specific protein  
52 oxidation and aggregation through mechanisms that involve type-II photosensitive reactions and  
53 secondary oxidative stress<sup>10-17</sup>. We posit that porphyrin-mediated protein aggregation in CEP  
54 plays a major mechanistic role in tissue damage that involves accumulation of fluorescent  
55 uro/copro-I.

56 We demonstrated that uro-I injection of zebrafish larvae mimics features of CEP,  
57 including uro-I accumulation in bones and bone deformation, as judged by decreased vertebra  
58 and operculum volume. Uro-I treatment of an osteoblastic human osteosarcoma cell line, Saos-  
59 2, caused significant decrease in mineral matrix synthesis and proteotoxicity. Using high-  
60 throughput drug screening, we identified acitretin, a 2<sup>nd</sup> generation retinoid, as an effective drug  
61 that mitigates some of the harmful effects of uro-I in zebrafish and Saos-2 cells.

## 62 RESULTS

63 **An inducible zebrafish model mimics bone defects of human CEP**

64 Uro-I injected zebrafish larvae showed porphyrin fluorescence in bone tissue (Fig.1A).  
65 To confirm that uro-I binds specifically to bone, larvae were co-injected with calcein (bone-  
66 specific dye) and imaged. Calcein and uro-I fluorescence co-localized (Fig.1B), confirming uro-I  
67 bound to bone. Additionally, uro-I-injected larvae exhibited severe photosensitivity and had to be  
68 shielded from light to prevent their death (not shown). Next, we assessed uro-I-mediated bone  
69 defect by measuring the volume of the operculum and 4<sup>th</sup> vertebra. Notably, uro-I injection  
70 significantly decreased operculum and 4<sup>th</sup> vertebra volume (Fig.1C).

71 Bone matrix is composed of protein/organic (including collagen/fibronectin/osteonectin)  
72 and inorganic components (minerals, mostly hydroxyapatite)<sup>18,19</sup>. We tested whether uro-I binds  
73 to the protein/organic or inorganic parts of bone matrix by demineralizing bones of uro-I-injected  
74 larvae. Demineralization caused loss of uro-I fluorescence, indicating that uro-I is extractable  
75 from the mineral matrix (Fig.1D). We validated this finding *in vitro* using hydroxyapatite crystals.  
76 Uro-I, but not copro-I, bound to hydroxyapatite, with calcein binding used as a positive control  
77 (Fig.1E). Therefore, uro-I binds to the inorganic bone matrix and its administration to zebrafish  
78 phenocopies three major features of CEP: osteal accumulation, bone defects, and severe  
79 photosensitivity.

#### 80 **Acitretin mitigates uro-I effects in bones of zebrafish larvae**

81 To identify potential drugs to treat CEP, we used our zebrafish CEP model and  
82 performed high-throughput screening of 1,280 small molecules by co-administering drug and  
83 uro-I injection (Fig.S2). Acitretin, a second-generation retinoid commonly used to treat psoriasis,  
84 decreased uro-I accumulation in bones (not shown). We validated the screening results and  
85 further characterized acitretin as a potential treatment for CEP by testing whether it had a  
86 prophylactic effect. Uro-I injected larvae were immediately transferred to either acitretin- or  
87 vehicle-containing medium. After 24h, acitretin-treated larvae had significantly reduced  
88 porphyrin fluorescence in their bones (operculum and vertebrae, Fig.2A,B) and increased uro-I  
89 excretion into the medium (Fig.2C), but no effect on operculum volume (Fig.2D). To assess the  
90 therapeutic potential of acitretin, larvae were injected with uro-I then transferred after 24h to  
91 medium containing either acitretin or vehicle and incubated for further 24h then imaged.  
92 Acitretin did not decrease bone porphyrin fluorescence (Fig.2E,F), but it increased uro-I  
93 excretion to the medium and operculum volume (Fig.2G,H).

94 Since acitretin is a retinoid, we tested whether the protective effects are specific to  
95 acitretin or shared by other retinoids. Etretinate (second-generation retinoid and precursor of  
96 acitretin), tretinoin (all trans-retinoic acid) or acitretin were co-administered to zebrafish with uro-  
97 I. In addition to acitretin, tretinoin significantly reduced bone porphyrin (Fig.2I). Unlike acitretin,

98 etretinate and tretinoin did not increase uro-I excretion into the medium (Fig.2J), and retinoids  
99 did not prevent loss in bone volume (Fig.2K). Thus, both retinoids, acitretin and tretinoin,  
100 prevent uro-I accumulation in zebrafish larvae. Hence, using our novel zebrafish CEP model, we  
101 demonstrated that acitretin attenuated uro-I-mediated bone damage by modulating the  
102 dynamics of uro-I bone binding and excretion.

### 103 **Uro-I impairs osteoblastic mineralization by aggregating matrix proteins, promoting ER** 104 **stress and inhibiting autophagy**

105 To elucidate the molecular mechanism of uro-I-mediated bone damage, we used Saos-2  
106 cells, a human osteosarcoma cell line with osteoblastic features<sup>20</sup>. Mineralization was stimulated  
107 by treating cells with a mineralization activation cocktail (MAC) and assayed by alizarin red S  
108 (ARS) staining. As expected, Saos-2 cells manifested a mineralization phenotype when cultured  
109 for 3 days in MAC-supplemented medium, while in uro-I+MAC supplemented medium,  
110 mineralization decreased significantly (Fig.3A,B). Uro-I also caused marked photosensitivity,  
111 leading to cell death when cells were not shielded from light (not shown).

112 Since fluorescent porphyrins cause protein aggregation or loss of antibody reactivity  
113 when tested by immunoblotting, we tested whether uro-I-mediated inhibition of Saos-2  
114 mineralization led to aggregation of bone matrix proteins. Blotting Saos-2 cell lysates prepared  
115 from uro-I or vehicle treated cells using antibodies to fibronectin, osteonectin and type 1 pro-  
116 collagen showed a distinct loss of monomer for these proteins after uro-I treatment (Fig.3C). We  
117 attribute the loss of antibody reactivity to epitope masking after uro-I binding and subsequent  
118 oxidation and aggregation, as shown previously for PP-IX<sup>13</sup>. The loss of matrix protein  
119 monomers and aggregation was verified by mass spectrometry (Fig.S3).

120 Given the effect of uro-I on protein aggregation, we tested whether uro-I treatment  
121 initiates unfolded protein response (UPR) and endoplasmic reticulum (ER) stress. We observed  
122 upregulation of BiP, consistent with UPR and ER stress<sup>21</sup> (Fig.3C). Other ER stress markers,  
123 including PERK, IRE1 $\alpha$  and ATF6, were likely oxidized and aggregated, as judged by monomer  
124 loss (Fig.3C). Our findings suggest a non-canonical form of ER stress, which we have observed  
125 upon PP-IX accumulation<sup>13</sup>, that involves aggregation and possibly inactivation of ER resident  
126 proteins and chaperones.

127 Autophagy modulates exocytosis of hydroxyapatite crystals and thus plays an important  
128 role in bone mineralization by osteoblasts<sup>22,23</sup>. Since uro-I inhibited mineralization, we tested  
129 whether it also disrupted autophagy. As expected, MAC-treated Saos-2 cells showed increased  
130 LC3-II (Fig.3D, left panel). Uro-I treatment also increased LC3-II levels (Fig.3D, right panel). The  
131 likely explanation for the increased LC3-II is not increased autophagy but a slowing of

132 autophagic flux, which could lead to stalling of exocytosis of mineral-loaded vesicles and  
133 decreased mineralization of bone matrix<sup>24</sup>.

134 To further characterize uro-I-mediated impairment of mineralization in Saos-2 cells, we  
135 performed gene expression analysis to probe for alterations in the stress response pathway.  
136 Genes that were differentially regulated two-fold or more after uro-I treatment were assessed  
137 further. Uro-I treatment increased *HSPA5* (2.1x) and *SOD3* (2.8x), while *SERPINH1* decreased  
138 (3.3x) (Fig.3E, left panel). Since *HSPA5* encodes BiP, *HSPA5* upregulation supports the BiP  
139 upregulation observed biochemically (Fig.3C). *SERPINH1*, a collagen-specific chaperone,  
140 downregulation may account for collagen misfolding and aggregation. Because type 1 collagen  
141 is the most abundant protein in bone matrix<sup>25</sup>, we assessed *COL1A1* expression and observed  
142 a 90% reduction in *COL1A1* after uro-I treatment (Fig.3E, right panel). This finding supports uro-  
143 I-induced loss of mineralization, since collagen serves as a matrix for mineral deposition.

144 We next asked whether acitretin can protect from the effects of uro-I, by treating Saos-2  
145 cells with uro-I in the presence of acitretin. Although acitretin did not prevent uro-I-mediated loss  
146 of mineralization (Fig.3F), it blunted the ER stress response by reducing BiP level and  
147 normalized the autophagic flux by reducing LC3-II (Fig.3G,H). Acitretin also downregulated  
148 *SOD3* 3.8-fold, thereby suggesting that acitretin mitigates the oxidative stress caused by uro-I  
149 (Fig.3I). Upregulation of *COL1A1* (1.7x) and *SERPINH1* (5.4x) was also observed.

150 Taken together, our data demonstrate that acitretin mitigates uro-I-mediated  
151 proteotoxicity and oxidative stress. However, under the conditions tested, acitretin did not  
152 rescue the impairment of mineralization caused by uro-I treatment of Saos-2 cells. A possible  
153 explanation for why mineralization was not normalized by acitretin is that ER stress and  
154 autophagy pathways need to be normalized in order for cells to have their mineralization ability  
155 restored. Alternatively, acitretin may act differently on various cell types which is one major  
156 advantage offered by the *in vivo* zebrafish system.

## 157 **DISCUSSION**

158 Uro-I is a fluorescent porphyrin capable of types I/II-photosensitized reactions<sup>26-28</sup>, which  
159 explains the observed photosensitivity in CEP, damage to digits and facial features<sup>3</sup>. However,  
160 light is unlikely to reach deep internal tissues, which are also affected in CEP. Of note, we  
161 observed uro-I-mediated protein aggregation and decreased mineralization in the dark. Previous  
162 studies had also reported dark effects of porphyrins. For example, uro-I increased collagen  
163 biosynthesis in human skin fibroblasts<sup>29</sup>, and inhibited erythrocytic uroporphyrinogen  
164 decarboxylase activity<sup>30</sup>. A 2-hit model could explain light-independent porphyrin-mediated  
165 protein aggregation and proteotoxicity whereby, in absence of light, a secondary oxidant source

166 (eg. inflammatory cells) causes protein oxidation followed by porphyrin binding to oxidized  
167 protein, yielding protein aggregates<sup>11,12</sup> (Fig.4). CEP is frequently associated with  
168 superinfections and osteolysis<sup>3,31</sup>. Hence, infiltrating immune cell-generated oxidants might  
169 serve as a secondary source of oxidant, leading to uro-I mediated protein aggregation in internal  
170 organs such as bones. Additionally, uro-I might generate oxidants by acting as a substrate for  
171 the ferredoxin/ferredoxin:NADP<sup>+</sup> oxidoreductase system<sup>32</sup>. Although  
172 ferredoxin/ferredoxin:NADP<sup>+</sup> oxidoreductase are commonly associated with hepatic  
173 microsomes, they are also expressed in osteoblasts<sup>33</sup> and could metabolize uro-I to generate  
174 oxidants in the absence of light.

175 The differences in charge and polarity of uro-I and PP-IX might explain the striking  
176 difference in their tissue localization. Retro-orbitally injected PP-IX accumulated in zebrafish  
177 liver<sup>10</sup>, while uro-I accumulated preferentially in bone (Fig.1). Of note, liver cancer cell lines do  
178 not uptake uroporphyrin (unpublished data), possibly due to its high negative charge that  
179 prevents traversing the cell membrane<sup>34</sup>. Based on our data, we propose that negatively  
180 charged uro-I binds to Ca<sup>2+</sup> in hydroxyapatite (Fig.4) and thus bone and Saos-2 cells are  
181 affected by uro-I. This association with bone matrix causes uro-I to have a different protein  
182 aggregation signature compared to PP-IX, which is primarily internalized. PP-IX aggregated  
183 intracellular proteins such as keratins and glyceraldehyde 3-phosphate dehydrogenase<sup>13,15,35</sup>,  
184 whereas uro-I affected extracellular bone matrix proteins (Fig.3). Oxidants such as singlet  
185 oxygen, a major oxidant produced by photosensitive reactions<sup>26</sup>, have extremely small  
186 intracellular diffusion distance (10-20nm) and lifetime (10–40ns)<sup>36-38</sup>. Binding of uro-I to bone  
187 matrix causes a ‘sensitizer-acceptor’ coupling, as observed for other diffusible oxidants<sup>39,40</sup>, and  
188 greatly increases the oxidation efficiency and specificity. Of note, oxidized fibronectin reduces  
189 mineralization of rat calvarial osteoblasts *in vitro*<sup>41</sup>. The high selectivity of uro-I localization to  
190 bone matrix might provide a pathway to develop photodynamic therapeutic agents for bone  
191 cancers such as osteosarcoma.

192 The management of CEP is challenging, with current therapeutic options focusing on  
193 bone marrow/hematopoietic stem cell transplantation<sup>3</sup>, and by avoidance of sun and light  
194 exposure, including the use of protective clothing<sup>42-45</sup>. There are also potential experimental  
195 therapeutic approaches including gene therapy<sup>46</sup>, proteasomal inhibitors<sup>47,48</sup>, iron chelation<sup>49,50</sup>  
196 and phlebotomy<sup>51</sup>. Most recently, the repurposed use of ciclopirox, an approved broad-spectrum  
197 antifungal agent, showed promising results in the treatment of CEP using a mouse model<sup>52</sup>.  
198 However, there are limitations to these approaches, such as complications from transplantation  
199 and neurotoxic side effects of proteasome inhibitors<sup>53</sup>. Currently there are no known



200 pharmaceuticals that act by clearance of uro-I, and in this regard acitretin provides a novel  
201 approach. Acitretin might also act as an antioxidant (Fig.4) due to its hyperconjugated  
202 nucleophilic double bonds. Thus, through a combination of destabilizing uro-I-bone matrix  
203 interaction and antioxidant activity, acitretin could ameliorate CEP manifestations (Fig.4).  
204 Acitretin also offers a drug repurposing advantage since it is already approved for psoriasis  
205 treatment<sup>54</sup>.

## 206 **MATERIALS AND METHODS**

### 207 **Zebrafish experiments and cell culture**

208 Zebrafish (*Danio rerio*) experiments were conducted using ABxTL hybrid and NHGRI-1 wild type  
209 zebrafish lines. All animal procedures were approved by the Rutgers University Institutional  
210 Animal Care and Use Committee (protocol number PROTO201900147) and performed in  
211 compliance with federal guidelines and the standards of the NIH Guide for the Care and Use of  
212 Laboratory Animals<sup>55</sup>, the Rutgers University IACUC Policy Handbook and the Animal  
213 Research: Reporting of *In Vivo* Experiments (ARRIVE) guidelines.

214 Saos-2 cells were purchased from ATCC. Cells were maintained in McCoy 5A medium  
215 supplemented with 15%FBS, penicillin/streptomycin, non-essential amino acids, Hepes and L-  
216 glutamine. To induce mineralization, cells were treated with mineralization activation cocktail  
217 (MAC), consisting of 5mM  $\beta$ -glycerophosphate, 50 $\mu$ M ascorbic acid and 10nM  
218 dexamethasone<sup>56</sup>.

### 219 **Uro-I solution preparation and treatment of zebrafish larvae and Saos-2 cells**

220 Uro-I (uroporphyrin-I dihydrochloride; Frontier Scientific, Catalog#:U830-1) was initially  
221 resuspended in 0.1M NaOH and the pH was adjusted to neutral using 0.2 M Na<sub>2</sub>HPO<sub>4</sub>. Six days  
222 post fertilization (dpf), ABTL zebrafish larvae were injected via the retro-orbital route with  
223 approximately 3nL of 7.2mM Uro-I solution and control larvae were injected with vehicle (0.1M  
224 NaOH in 0.2M Na<sub>2</sub>HPO<sub>4</sub>). After injection, larvae were immediately transferred to Petri dishes  
225 wrapped with heavy duty aluminum foil and kept in a dark incubator, at 28.5°C for 24h. Where  
226 indicated, 7 dpf larvae were injected with approximately 2 nL of 0.2% w/v calcein (Sigma,  
227 Catalog#:C0875) 2h prior to imaging.

228 Saos-2 cells were plated in 12-well plates (1.5x10<sup>5</sup> cells/well) and allowed to attach overnight.  
229 Cells were then treated with Uro-I (144 $\mu$ M final concentration) or vehicle in medium containing  
230 MAC for 3 days. Experiments were conducted in a dark room and cells were kept shielded from  
231 light in a tissue culture incubator.

### 232 **Confocal microscopy imaging and quantification**

233 Seven dpf ABxTL zebrafish larvae were anesthetized with tricaine-S (Syndel) and immobilized  
234 in 0.5% low melt agarose. Fluorescent z-series were captured using an Olympus FV500  
235 confocal microscope (10X objective, confocal aperture of 300 $\mu$ m) with an optical thickness of  
236 10 $\mu$ m and z-step size of 10 $\mu$ m. Calcein was excited with a 488nm argon laser and emission  
237 was captured between 505 and 525nm. Porphyrin was excited with a 405nm laser diode and  
238 emission was captured above 560nm. Three-dimensional image reconstruction and  
239 quantification of fluorescent signal and bone volume were performed using Imaris 3D  
240 visualization and analysis software v7.7 (Bitplane).

#### 241 ***In vivo* and *in vitro* binding of uro-I**

242 Six dpf ABxTL zebrafish larvae were injected with Uro-I or vehicle (as described above) and 24  
243 h later were euthanized by tricaine-S overdose on ice bath. Bones were harvested as previously  
244 described<sup>57</sup>. Briefly, soft tissue was removed by incubating larvae with Accumax solution  
245 (MilliporeSigma, Catalog#:A7089) under vigorous shaking. Bones were collected using a 70 $\mu$ m  
246 cell strainer, followed by demineralization with 1.2M HCl. Fluorescent images were captured  
247 prior to and after the demineralization step using a Zeiss Axio Imager M2 fluorescence  
248 microscope. Porphyrin signal was captured using the red fluorescent channel.

249 10mg hydroxyapatite (Acros Organics, Catalog#:1306-06-5) was incubated with 1mM Uro-I, 1  
250 mM Copro-I (coproporphyrin-I dihydrochloride, Frontier Scientific, Catalog#:C654-1), vehicle or  
251 0.2% calcein for 30min in the dark and vortexed every five minutes. Samples were washed and  
252 imaged by epifluorescence microscopy as described above.

#### 253 **High throughput drug screening**

254 Unbiased high throughput drug screening was performed using the Prestwick library (Prestwick  
255 Chemical), which consists of 1,280 small molecules chosen by the manufacturer for their  
256 bioavailability and safety. A pooled approach, where four compounds were tested together, was  
257 used in order to optimize animal use and investigation of drugs with potential for CEP treatment.  
258 Zebrafish E3 medium (100  $\mu$ L/well) was transferred to a 96-well half area imaging plate  
259 (Corning, cat. n. 3880) using a Multidrop dispenser (ThermoFisher Scientific). Compounds  
260 (0.4 $\mu$ L of 2mM stock) were added to the wells using a multichannel plate handling robot  
261 (Biomek FX, Beckman Coulter Life Sciences). This step was performed four times in order to  
262 pool four compounds into one well: one 384-well stock plate yielded one 96-well test plate.  
263 Control wells contained 1.6 $\mu$ L of DMSO.

264 Six dpf NHGRI-1 zebrafish larvae were injected retro-orbitally with approximately 2nL of a  
265 solution of Uro-I (10mM) and calcein (0.2% w/v). Immediately after injection, larvae were  
266 transferred to a 96-well test plate (two larvae in 50  $\mu$ L of E3 medium/well), including the DMSO



267 control wells. Control larvae injected with the drug vehicle (dimethyl sulfoxide, DMSO) and  
268 calcein were transferred to E3 medium-only containing wells. Larvae were kept in the dark, at  
269 28.5°C. After 24h, they were anesthetized with tricaine-S, centrifuged at 500xg for two minutes  
270 and imaged using the ImageXpress Micro Cellular Imaging and Analysis System (Molecular  
271 Devices). Positive hits were selected based on visual identification of calcein signal increase  
272 and porphyrin signal decrease compared to DMSO-treated larvae. Compounds in test wells that  
273 met the inclusion criterion were tested individually in the same manner as described above  
274 (Figure S2).

### 275 **Acitretin validation and treatment**

276 A dose-response curve with acitretin (Selleck Chemicals, Houston, TX) was conducted (0.5-  
277 12.5 $\mu$ M) and 10 $\mu$ M was observed to yield consistent results, without being toxic to zebrafish  
278 larvae. Validation and characterization of acitretin as a potential treatment for CEP was  
279 performed. Six dpf ABTL zebrafish larvae injected with uro-I were immediately transferred to  
280 10cm plastic dishes containing 10 $\mu$ M acitretin or DMSO in E3 medium (prophylaxis protocol,  
281 Fig.2A), and incubated for 24 h in the dark at 28.5°C. Porphyrin binding to bones and bone  
282 volume were analyzed by confocal microscopy as described above. Porphyrin excretion into the  
283 medium was quantified. Uro-I-injected larvae were transferred to 96-well plates, one larva/well,  
284 100 $\mu$ L of 10 $\mu$ M acitretin or DMSO/well. Medium was collected after 24h and porphyrin was  
285 quantified as described previously<sup>13</sup>. Etreinate (Selleck Chemicals, Houston, TX) and tretinoin  
286 (Selleck Chemicals, Houston, TX) treatment was performed as described for acitretin.

287 In addition to being used as prophylaxis, we evaluated whether acitretin had a therapeutic  
288 effect. Six dpf ABxTL zebrafish larvae were injected with Uro-I and 24h later they were  
289 transferred to E3 medium containing 10 $\mu$ M acitretin or DMSO. Porphyrin binding, excretion and  
290 bone volume were analyzed as described above. For Saos-2 cells, they were treated with 10 $\mu$ M  
291 acitretin or DMSO in medium containing MAC and Uro-I.

### 292 **Alizarin Red S (ARS) staining and quantification**

293 Cell mineralization was quantified by ARS (Sigma Aldrich St. Louis, MO) staining as described  
294 previously<sup>58</sup> with minor modifications. Briefly, cells were fixed with 100% ethanol at 37°C for 1h,  
295 stained with 40mM (pH4.2) ARS solution for 20min in an orbital shaker. Cells were washed and  
296 ARS was extracted by incubation of fixed cells with 10% (v/v) acetic acid, followed by scraping,  
297 incubation of suspension (85°C, 10min), centrifugation and neutralization of supernatant with  
298 10% (v/v) ammonium hydroxide. ARS standard curve (from 2-0.02mM) and samples were  
299 transferred in triplicate to a 96-well plate and absorbance was measured at 405nm.

### 300 **Cell harvest, immunoblotting and mass spectrometry**

301 Saos-2 cells were lysed in ice cold RIPA buffer (Sigma Aldrich, St. Louis, MO) with protease  
302 inhibitor cocktail (Thermo Scientific, Waltham, MA) and scraped. Whole cell lysate was kept in  
303 the dark until reducing SDS-PAGE sample buffer was added. Immunoblotting, band  
304 densitometry and mass spectrometry were conducted as described previously<sup>12,13</sup>. The  
305 antibodies used and their vendors are as listed. Antibodies to the indicated antigens (and  
306 sources) are: ATF6, BiP, LC3B (Cell Signaling Technology, Danvers, MA); fibronectin HFN 7.1,  
307 pro-collagen SP1.D8, osteonectin AON-1 (Developmental Studies Hybridoma Bank; Iowa City,  
308 Iowa); IRE1 $\alpha$ , PERK (Invitrogen, Carlsbad, CA); lamin A/C (Santa Cruz Biotechnology, Dallas,  
309 TX).

### 310 **Gene expression profiling**

311 Saos-2 cells RNA was extracted using RNeasy mini kit (Qiagen, Catalog#:74104). and gene  
312 expression was carried using the RT<sup>2</sup> Profiler PCR Array for human cellular stress responses  
313 (Qiagen, Catalog#:PAHS-019ZA) following manufacturer's instructions. A previously described  
314 qPCR<sup>59</sup> was performed for *COL1A1* and *SERPINH1* (IDT Integrated DNA Technologies,  
315 PrimeTime assay ID Hs.PT.58.15517795 and Hs.PT.56a.26865778, respectively).

### 316 **Statistical analysis**

317 Statistical analysis was performed using GraphPad Prism v8 (GraphPad Software). Unpaired  
318 two-tailed Student's t-test was used to determine statistical significance. Error bars represent  
319 standard error of the mean. \* $p < 0.05$ , \*\* $p < 0.01$ , \*\*\* $p < 0.001$ , \*\*\*\* $p < 0.0001$ .

### 320 **REFERENCES**

- 321 1 Puy, H., Gouya, L. & Deybach, J.-C. Porphyrias. *The Lancet* **375**, 924-937,  
322 doi:10.1016/S0140-6736(09)61925-5 (2010).
- 323 2 Ajioka, R. S., Phillips, J. D. & Kushner, J. P. Biosynthesis of heme in mammals.  
324 *Biochimica et Biophysica Acta (BBA) - Molecular Cell Research* **1763**, 723-736,  
325 doi:https://doi.org/10.1016/j.bbamcr.2006.05.005 (2006).
- 326 3 Erwin, A. L. & Desnick, R. J. Congenital erythropoietic porphyria: Recent advances.  
327 *Molecular Genetics and Metabolism* **128**, 288-297 (2019).
- 328 4 Di Pierro, E. *et al.* Congenital erythropoietic porphyria linked to GATA1-R216W mutation:  
329 challenges for diagnosis. *European Journal of Haematology* **94**, 491-497,  
330 doi:10.1111/ejh.12452 (2015).
- 331 5 Yasuda, M., Chen, B. & Desnick, R. J. Recent advances on porphyria genetics:  
332 Inheritance, penetrance & molecular heterogeneity, including new modifying/causative  
333 genes. *Mol Genet Metab* **128**, 320-331, doi:10.1016/j.ymgme.2018.11.012 (2019).
- 334 6 Balwani, M. & Desnick, R. J. The porphyrias: advances in diagnosis and treatment.  
335 *Blood* **120**, 4496-4504, doi:10.1182/blood-2012-05-423186 (2012).
- 336 7 Di Pierro, E., Brancaleoni, V. & Granata, F. Advances in understanding the pathogenesis  
337 of congenital erythropoietic porphyria. *Br J Haematol* **173**, 365-379,  
338 doi:10.1111/bjh.13978 (2016).
- 339 8 Bonkovsky, H. L. *et al.* Porphyrin and heme metabolism and the porphyrias.  
340 *Comprehensive Physiology* **3**, 365-401, doi:10.1002/cphy.c120006 (2013).

- 341 9 Katugampola, R. P. *et al.* Congenital erythropoietic porphyria: a single-observer clinical  
342 study of 29 cases. *The British journal of dermatology* **167**, 901-913, doi:10.1111/j.1365-  
343 2133.2012.11160.x (2012).
- 344 10 Elenbaas, J. S. *et al.* A precursor-inducible zebrafish model of acute protoporphyria with  
345 hepatic protein aggregation and multiorganelle stress. *FASEB J* **30**, 1798-1810,  
346 doi:10.1096/fj.201500111R (2016).
- 347 11 Maitra, D. *et al.* Porphyrin-Induced Protein Oxidation and Aggregation as a Mechanism  
348 of Porphyria-Associated Cell Injury. *Cell Mol Gastroenterol Hepatol* **8**, 535-548,  
349 doi:10.1016/j.jcmgh.2019.06.006 (2019).
- 350 12 Maitra, D. *et al.* Oxygen and Conformation Dependent Protein Oxidation and  
351 Aggregation by Porphyrins in Hepatocytes and Light-Exposed Cells. *Cell Mol*  
352 *Gastroenterol Hepatol* **8**, 659-682 e651, doi:10.1016/j.jcmgh.2019.05.010 (2019).
- 353 13 Maitra, D. *et al.* Ambient Light Promotes Selective Subcellular Proteotoxicity after  
354 Endogenous and Exogenous Porphyrinogenic Stress. *J Biol Chem* **290**, 23711-23724,  
355 doi:10.1074/jbc.M114.636001 (2015).
- 356 14 Saggi, H. *et al.* Loss of hepatocyte beta-catenin protects mice from experimental  
357 porphyria-associated liver injury. *J Hepatol* **70**, 108-117, doi:10.1016/j.jhep.2018.09.023  
358 (2019).
- 359 15 Singla, A. *et al.* Lamin aggregation is an early sensor of porphyria-induced liver injury. *J*  
360 *Cell Sci* **126**, 3105-3112, doi:10.1242/jcs.123026 (2013).
- 361 16 Zhang, H. *et al.* Tumor-selective proteotoxicity of verteporfin inhibits colon cancer  
362 progression independently of YAP1. *Sci Signal* **8**, ra98, doi:10.1126/scisignal.aac5418  
363 (2015).
- 364 17 Maitra, D. *et al.* Protoporphyrin-IX nanostructures modulate their protein aggregation  
365 ability via differential oxidation and protein binding. *bioRxiv*, 2021.2001.2011.426224,  
366 doi:10.1101/2021.01.11.426224 (2021).
- 367 18 Crockett, J. C., Rogers, M. J., Coxon, F. P., Hocking, L. J. & Helfrich, M. H. Bone  
368 remodelling at a glance. *J Cell Sci* **124**, 991-998, doi:10.1242/jcs.063032 (2011).
- 369 19 Raggatt, L. J. & Partridge, N. C. Cellular and molecular mechanisms of bone  
370 remodeling. *J Biol Chem* **285**, 25103-25108, doi:10.1074/jbc.R109.041087 (2010).
- 371 20 Rodan, S. B. *et al.* Characterization of a human osteosarcoma cell line (Saos-2) with  
372 osteoblastic properties. *Cancer research* **47**, 4961-4966 (1987).
- 373 21 Pavelka, K., Vojtisek, O., Bremova, A., Dostal, C. & Kralova, M. [A new nonsteroid  
374 antirheumatic drug diclofenac in the treatment of rheumatoid arthritis (preliminary report)].  
375 *Fysiatr Revmatol Vestn* **55**, 355-359 (1977).
- 376 22 Nollet, M. *et al.* Autophagy in osteoblasts is involved in mineralization and bone  
377 homeostasis. *Autophagy* **10**, 1965-1977, doi:10.4161/auto.36182 (2014).
- 378 23 Yin, X. *et al.* Autophagy in bone homeostasis and the onset of osteoporosis. *Bone*  
379 *Research* **7**, 28, doi:10.1038/s41413-019-0058-7 (2019).
- 380 24 Bottini, M. *et al.* Matrix vesicles from chondrocytes and osteoblasts: Their biogenesis,  
381 properties, functions and biomimetic models. *Biochim Biophys Acta Gen Subj* **1862**, 532-  
382 546, doi:10.1016/j.bbagen.2017.11.005 (2018).
- 383 25 N. Cooper, L. & Maas, M. C. in *Encyclopedia of Marine Mammals (Third Edition)* (eds  
384 Bernd Würsig, J. G. M. Thewissen, & Kit M. Kovacs) 114-118 (Academic Press, 2018).
- 385 26 Baptista, M. S. *et al.* Type I and Type II Photosensitized Oxidation Reactions: Guidelines  
386 and Mechanistic Pathways. *Photochem Photobiol* **93**, 912-919, doi:10.1111/php.12716  
387 (2017).
- 388 27 Takeshita, K., Olea-Azar, C. A., Mizuno, M. & Ozawa, T. Singlet oxygen-dependent  
389 hydroxyl radical formation during uroporphyrin-mediated photosensitization in the  
390 presence of NADPH. *Antioxidants & redox signaling* **2**, 355-362 (2000).

- 391 28 Herrmann, G., Bolsen, K., Prenzel, K., Goerz, G. & Scharffetter-Kochanek, K.  
392 Photosensitization of uroporphyrin augments the ultraviolet A-induced synthesis of  
393 matrix metalloproteinases in human dermal fibroblasts. *Journal of investigative*  
394 *dermatology* **107**, 398-403 (1996).
- 395 29 Varigos, G., Schiltz, J. R. & Bickers, D. R. Uroporphyrin I stimulation of collagen  
396 biosynthesis in human skin fibroblasts. A unique dark effect of porphyrin. *J Clin Invest*  
397 **69**, 129-135, doi:10.1172/jci110423 (1982).
- 398 30 Afonso, S. G., Chinarro, S., De Salamanca, R. E. & Batlle, A. M. D. C. Further Evidence  
399 on the Photodynamic and the Novel Non-Photodynamic Inactivation of  
400 Uroporphyrinogen Decarboxylase by Uroporphyrin I. *Journal of Enzyme Inhibition* **5**,  
401 225-233, doi:10.3109/14756369109080061 (1991).
- 402 31 Horner, M. E. *et al.* Cutaneous porphyrias part I: epidemiology, pathogenesis,  
403 presentation, diagnosis, and histopathology. *International Journal of Dermatology* **52**,  
404 1464-1480, doi:10.1111/ijd.12305 (2013).
- 405 32 Morehouse, K. M. & Mason, R. P. The enzymatic one-electron reduction of porphyrins to  
406 their anion free radicals. *Archives of biochemistry and biophysics* **283**, 306-310 (1990).
- 407 33 Teplyuk, N. M. *et al.* The osteogenic transcription factor runx2 controls genes involved in  
408 sterol/steroid metabolism, including CYP11A1 in osteoblasts. *Molecular endocrinology*  
409 *(Baltimore, Md.)* **23**, 849-861, doi:10.1210/me.2008-0270 (2009).
- 410 34 Krishnamurthy, P., Xie, T. & Schuetz, J. D. The role of transporters in cellular heme and  
411 porphyrin homeostasis. *Pharmacology & Therapeutics* **114**, 345-358,  
412 doi:https://doi.org/10.1016/j.pharmthera.2007.02.001 (2007).
- 413 35 Snider, N. T. *et al.* Energy determinants GAPDH and NDPK act as genetic modifiers for  
414 hepatocyte inclusion formation. *J Cell Biol* **195**, 217-229, doi:10.1083/jcb.201102142  
415 (2011).
- 416 36 Davies, M. J. Reactive species formed on proteins exposed to singlet oxygen.  
417 *Photochemical and Photobiological Sciences* **3**, 17-25, doi:10.1039/b307576c (2004).
- 418 37 Moan, J. & Berg, K. THE PHOTODEGRADATION OF PORPHYRINS IN CELLS CAN  
419 BE USED TO ESTIMATE THE LIFETIME OF SINGLET OXYGEN. *Photochemistry and*  
420 *Photobiology* **53**, 549-553, doi:10.1111/j.1751-1097.1991.tb03669.x (1991).
- 421 38 Pattison, D. I., Rahmanto, A. S. & Davies, M. J. Photo-oxidation of proteins.  
422 *Photochemical and Photobiological Sciences* **11**, 38-53, doi:10.1039/c1pp05164d  
423 (2012).
- 424 39 Klaper, M., Fudickar, W. & Linker, T. Role of Distance in Singlet Oxygen Applications: A  
425 Model System. *Journal of the American Chemical Society* **138**, 7024-7029,  
426 doi:10.1021/jacs.6b01555 (2016).
- 427 40 Zheng, L. *et al.* Apolipoprotein A-I is a selective target for myeloperoxidase-catalyzed  
428 oxidation and function impairment in subjects with cardiovascular disease. *Journal of*  
429 *Clinical Investigation* **114**, 529-541, doi:10.1172/JCI200421109 (2004).
- 430 41 Suzuki, H., Hayakawa M Fau - Kobayashi, K., Kobayashi K Fau - Takiguchi, H.,  
431 Takiguchi H Fau - Abiko, Y. & Abiko, Y. H<sub>2</sub>O<sub>2</sub>-derived free radicals treated fibronectin  
432 substratum reduces the bone nodule formation of rat calvarial osteoblast.
- 433 42 Matthew, H., Anthony, H. & Donald, R. Congenital erythropoietic porphyria—long-term  
434 follow up of a case and review. (2017).
- 435 43 Badminton, M. N. & Elder, G. H. Management of acute and cutaneous porphyrias.  
436 *International journal of clinical practice* **56**, 272-278 (2002).
- 437 44 Balwani, M., Bloomer, J., Desnick, R., of the NIH-Sponsored, P. C. & Network, R. D. C.  
438 R. in *GeneReviews*@[Internet] (University of Washington, Seattle, 2017).
- 439 45 Erwin, A. L., Balwani, M. & Desnick, R. in *GeneReviews*@[Internet] (University of  
440 Washington, Seattle, 2013).



- 441 46 Robert-Richard, E. *et al.* Effective gene therapy of mice with congenital erythropoietic  
442 porphyria is facilitated by a survival advantage of corrected erythroid cells. *The American*  
443 *Journal of Human Genetics* **82**, 113-124 (2008).
- 444 47 Ben Bdira, F. *et al.* Tuning intracellular homeostasis of human uroporphyrinogen III  
445 synthase by enzyme engineering at a single hotspot of congenital erythropoietic  
446 porphyria. *Human molecular genetics* **23**, 5805-5813 (2014).
- 447 48 Blouin, J.-M. *et al.* Missense UROS mutations causing congenital erythropoietic  
448 porphyria reduce UROS homeostasis that can be rescued by proteasome inhibition.  
449 *Human molecular genetics* **26**, 1565-1576 (2017).
- 450 49 Blouin, J. M. *et al.* Iron chelation rescues hemolytic anemia and skin photosensitivity in  
451 congenital erythropoietic porphyria. *Blood*, doi:10.1182/blood.2020006037 (2020).
- 452 50 Egan, D. N., Yang, Z., Phillips, J. & Abkowitz, J. L. Inducing iron deficiency improves  
453 erythropoiesis and photosensitivity in congenital erythropoietic porphyria. *Blood* **126**,  
454 257-261, doi:10.1182/blood-2014-07-584664 (2015).
- 455 51 Mirmiran, A. *et al.* Phlebotomy as an efficient long-term treatment of congenital  
456 erythropoietic porphyria. *Haematologica* **Online ahead of print**,  
457 doi:10.3324/haematol.2019.228270 (2020).
- 458 52 Urquiza, P. *et al.* Repurposing ciclopirox as a pharmacological chaperone in a model of  
459 congenital erythropoietic porphyria. *Science translational medicine* **10**,  
460 doi:10.1126/scitranslmed.aat7467 (2018).
- 461 53 Blouin, J.-M. *et al.* Therapeutic potential of proteasome inhibitors in congenital  
462 erythropoietic porphyria. *Proceedings of the National Academy of Sciences* **110**, 18238-  
463 18243 (2013).
- 464 54 Dunn, L. K., Gaar, L. R., Yentzer, B. A., O'Neill, J. L. & Feldman, S. R. Acitretin in  
465 dermatology: a review. *J Drugs Dermatol* **10**, 772-782 (2011).
- 466 55 National Research Council Committee for the Update of the Guide for the Care and Use of  
467 Laboratory Animals. *Guide for the Care and Use of Laboratory Animals* (National  
468 Academies Press (US) Copyright © 2011, National Academy of Sciences., 2011).
- 469 56 Wiens, M. *et al.* Osteogenic potential of biosilica on human osteoblast-like (SaOS-2)  
470 cells. *Calcif Tissue Int* **87**, 513-524, doi:10.1007/s00223-010-9408-6 (2010).
- 471 57 Kessels, M. Y. *et al.* Proteomics analysis of the zebrafish skeletal extracellular matrix.  
472 *PLoS One* **9**, e90568, doi:10.1371/journal.pone.0090568 (2014).
- 473 58 Harper, E. *et al.* TRAIL attenuates RANKL-mediated osteoblastic signalling in vascular  
474 cell mono-culture and co-culture models. *PLoS One* **12**, e0188192,  
475 doi:10.1371/journal.pone.0188192 (2017).
- 476 59 Elenbaas, J. S. *et al.* Lamin A/C Maintains Exocrine Pancreas Homeostasis by  
477 Regulating Stability of RB and Activity of E2F. *Gastroenterology* **154**, 1625-1629 e1628,  
478 doi:10.1053/j.gastro.2018.01.024 (2018).

## 479 **ACKNOWLEDGEMENTS**

480 We thank the following research cores at the University of Michigan: Center for Chemical  
481 Genomics; Microscopy, Imaging and Cellular Physiology Core (MICPC) Imaging Laboratory;  
482 and the Proteomics Research Facility.

## 483 **AUTHOR CONTRIBUTIONS**

484 Conceptualization: J.B.C., J.S.E., D.M., M.B.O.; Methodology: J.B.C., J.S.E., J.A.S.;  
485 Investigation: J.B.C., J.S.E., N.K., R.A.D., A.C.F., M.S.G., S.I.L.; Writing original draft: J.B.C.,  
486 D.M.; Review and editing of the manuscript: J.B.C., D.M., M.B.O.; Review of final version prior

487 to submission: all authors; Overall Project Supervision: M.B.O.; Funding acquisition: M.B.O.,  
488 J.A.S.

489 **COMPETING INTERESTS**

490 The authors have no conflicts of interest to declare. A provisional patent application for the use  
491 of retinoids as a possible therapy for CEP has been filed.

492 **FUNDING**

493 This work is supported by NIH R01 DK116548 (M.B.O.), R35 HL150784 (J.A.S.), and P30  
494 DK020572 (MICPC Imaging Lab).



495 **FIGURES**

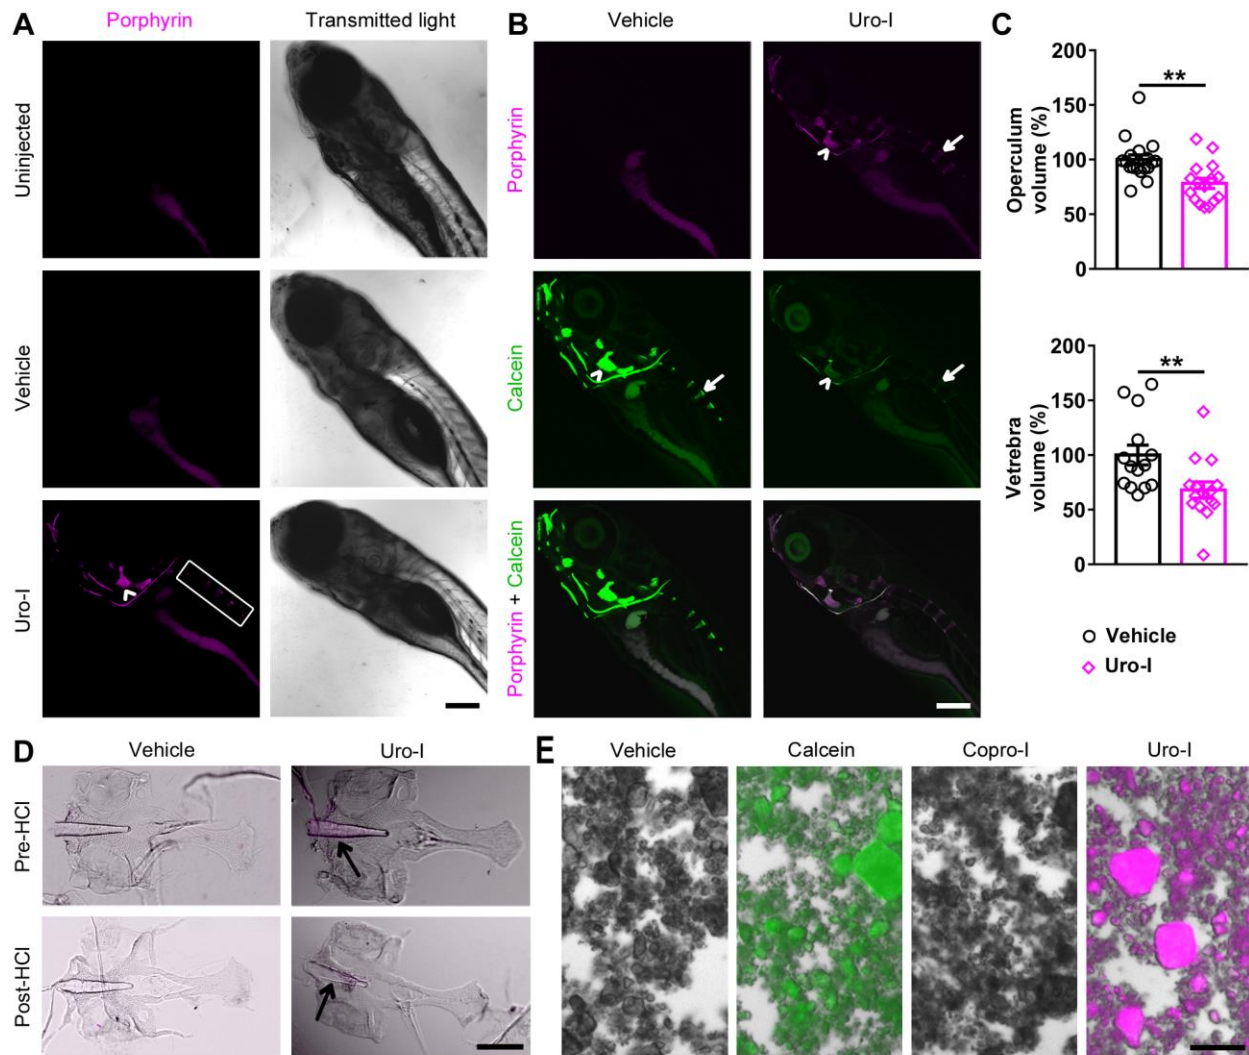

496  
 497 **Figure 1. Zebrafish model of CEP develops bone phenotype resembling human disease**  
 498 **(A)** 6dpf zebrafish larvae were injected with uro-I or vehicle and imaged by confocal microscopy  
 499 at 7dpf. Porphyrin was detected only in the bones of uro-I-injected group. Arrowhead-  
 500 operculum; box-vertebrae. **(B)** Larvae were treated as in (A) and injected with calcein prior to  
 501 imaging. Arrowhead-operculum; arrow-4<sup>th</sup> vertebra. **(C)** Quantification of bone volume in larvae  
 502 from (B); bone volume was normalized to vehicle-injected larvae set to 100%. Symbols  
 503 represent individual larvae (14-18/group) from 4-5 independent experiments. **(D)** Larvae were  
 504 treated as in (A). At 7dpf bones were harvested and imaged by epifluorescence microscopy pre  
 505 and post HCl bone demineralization, arrow-notochord. **(E)** Hydroxyapatite was incubated with  
 506 calcein/uro-I/copro-I and imaged by epifluorescence microscopy. Scale bars: 200µm (A-D);  
 507 50µm (E). \*\* $p < 0.01$

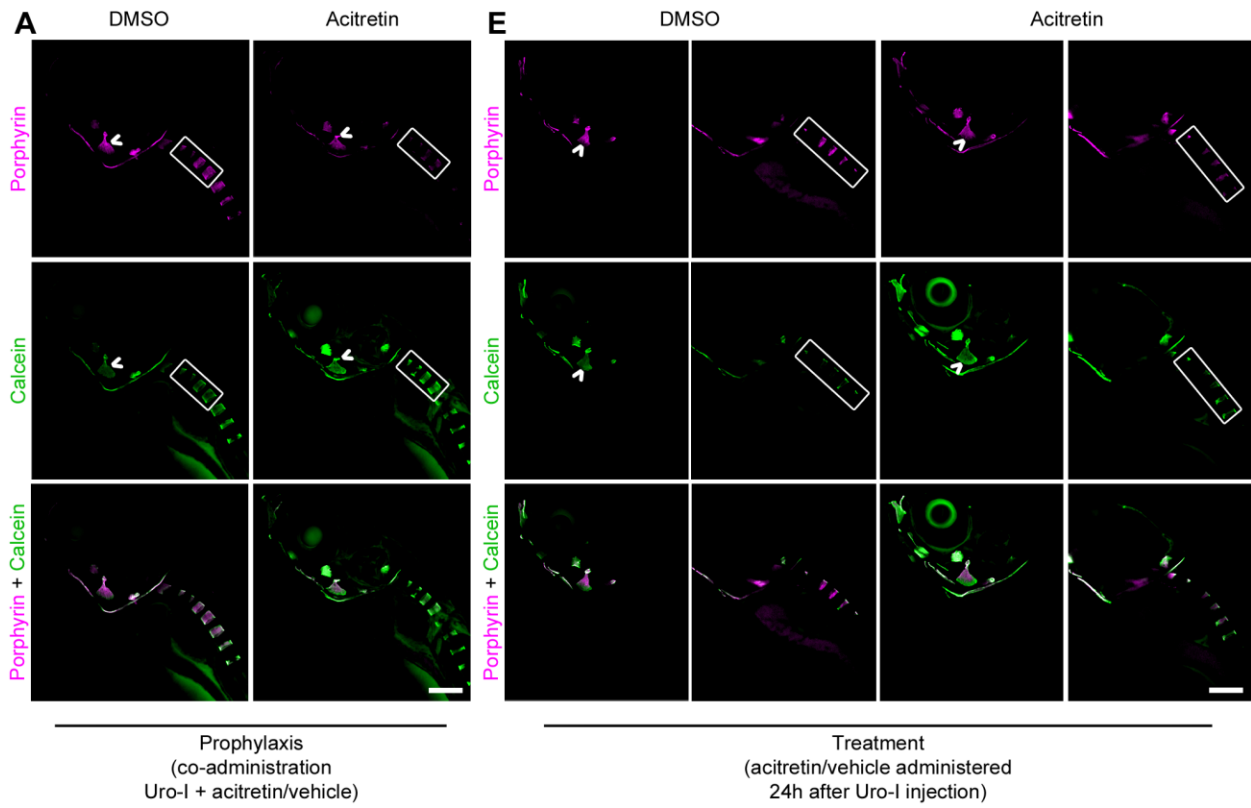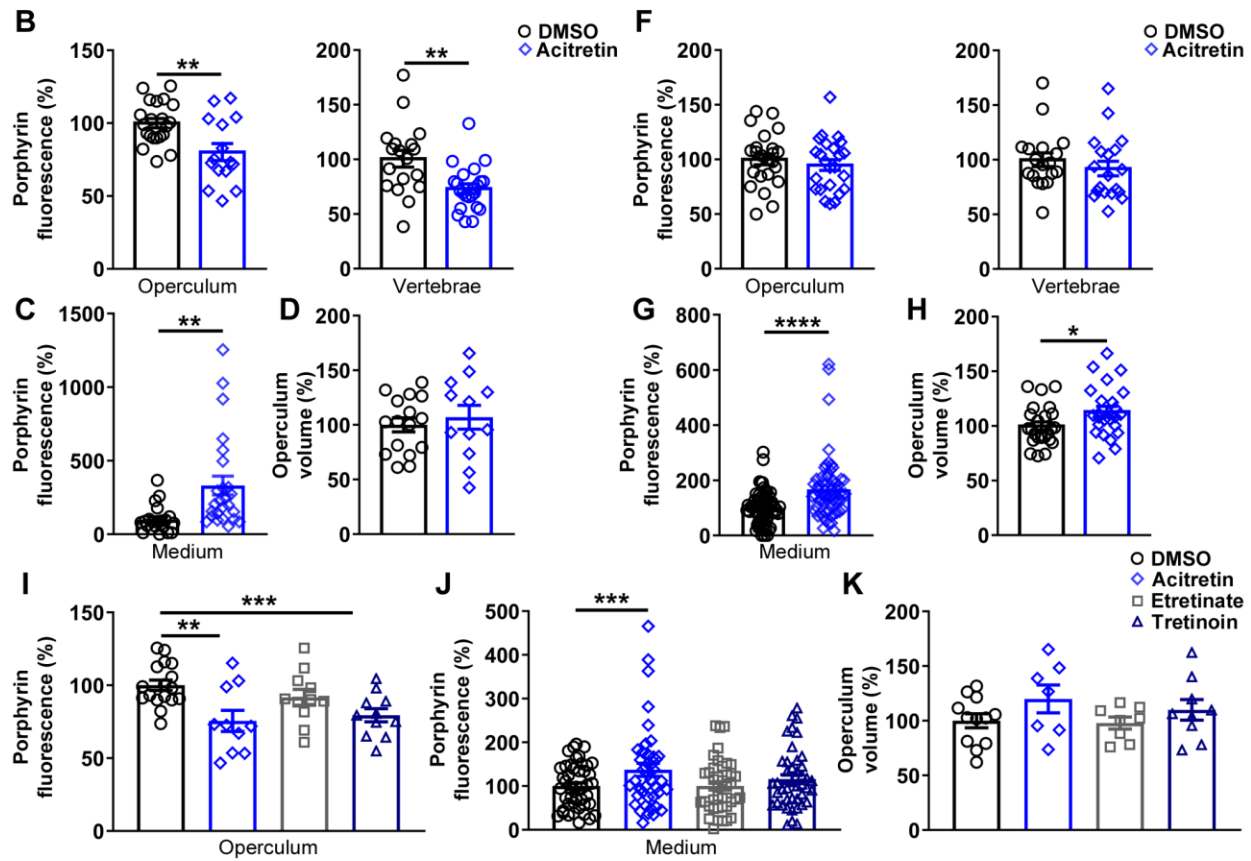

508

509

510 **Figure 2. Acitretin mitigates CEP bone phenotype in zebrafish**

511 **(A)** 6dpf larvae were injected with uro-I and transferred to medium containing acitretin or DMSO.  
512 At 7dpf larvae were injected with calcein and imaged by confocal microscopy. Quantification of  
513 porphyrin fluorescence **(B)**, porphyrin excretion **(C)** and operculum volume **(D)** from experiment  
514 in (A). Symbols represent individual larvae (12-25/group) from 3-4 independent experiments. **(E)**  
515 6dpf larvae were injected with uro-I. At 7dpf they were transferred to medium containing acitretin  
516 or DMSO. At 8dpf larvae were injected with calcein and imaged by confocal microscopy.  
517 Quantification of porphyrin fluorescence **(F)**, porphyrin excretion **(G)** and operculum volume **(H)**  
518 from experiment in (E). Arrowhead-operculum; box-vertebrae (A,E). Symbols represent  
519 individual larvae (18-64/group) from 3-4 independent experiments. **(I,J,K)** Larvae were treated  
520 as in (A) with the indicated retinoid or DMSO and porphyrin fluorescence (I), porphyrin excretion  
521 (J) and operculum volume (K) were assayed. Bone volume was normalized to DMSO-treated  
522 larvae set to 100%, (D,H,K). Porphyrin excretion was normalized to DMSO-treated larvae set to  
523 100%, (C,G,J). Symbols represent individual larvae (7-44/group) from 2-4 independent  
524 experiments. Scale bars: 200 $\mu$ m. \* $p$ <0.05, \*\* $p$ <0.01, \*\*\* $p$ <0.001, \*\*\*\* $p$ <0.0001

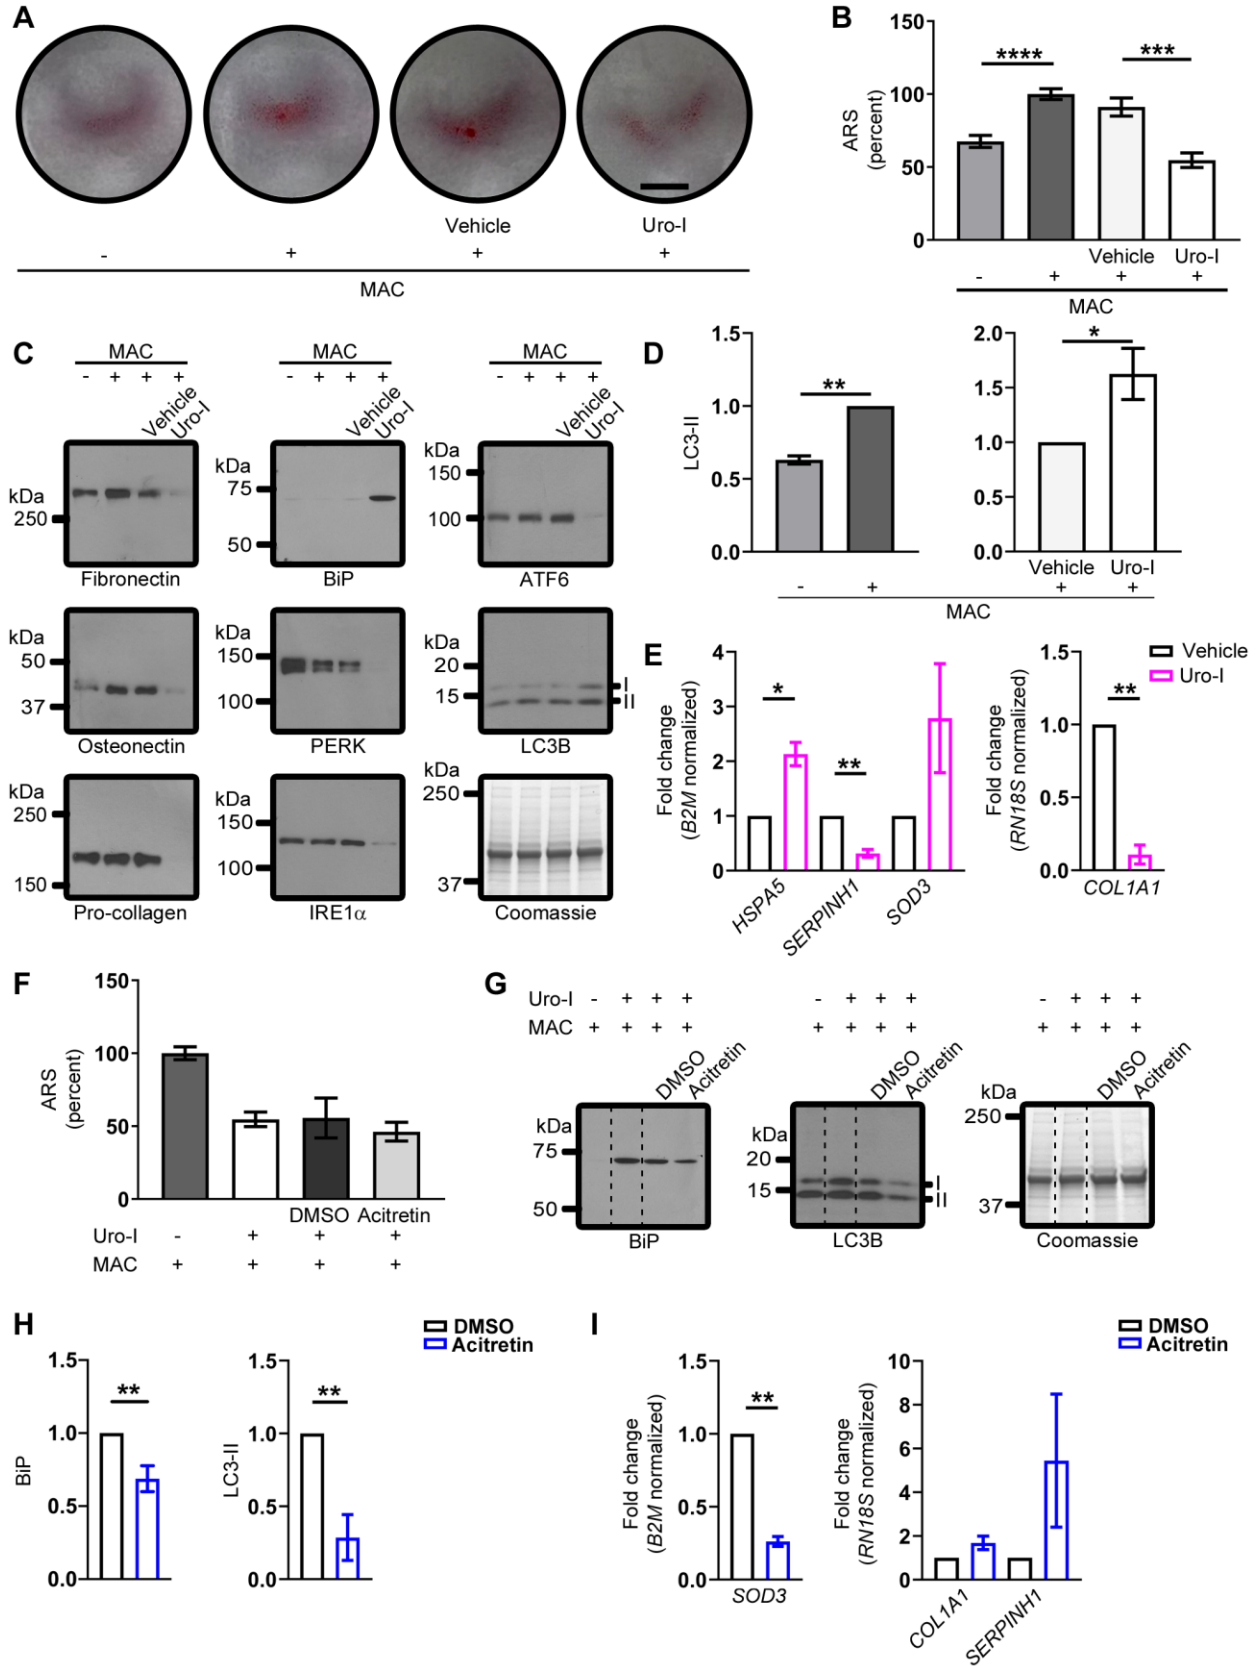

525

526

527 **Figure 3. Saos-2 cells mimic CEP zebrafish model**

528 **(A,B)** Mineralization in Saos-2 cells treated with MAC±Uro-I was assayed using ARS staining  
529 (photograph, A; quantification, B). Staining was normalized to MAC only-treated cells (set to  
530 100%). **(C)** Cell lysates from experiment in (A) were blotted with the indicated antibodies. **(D)**  
531 Quantification of LC3-II shown in (C). LC3-II level was normalized to MAC only (left panel) or  
532 vehicle-treated (right panel), set to 100%. **(E)** RT<sup>2</sup> Profiler PCR Array (left panel) and qPCR  
533 (right panel). Relative gene expression is represented as fold change normalized to  
534 housekeeping gene. Data are from 2 independent experiments. **(F)** Acitretin does not rescue  
535 reduced mineral matrix phenotype in uro-I-treated cells. ARS staining quantification as in (B).  
536 **(G)** Acitretin normalizes ER stress (BiP) and autophagy (LC3-II) markers. Dashed lines  
537 represent non-adjacent lanes in the gel. Coomassie-stained gel (C,G) shows equal protein  
538 loading. **(H)** Quantification of LC3-II. LC3-II level was normalized to DMSO-treated cells set to  
539 100%. **(I)** Gene expression profiling as in (E). \* $p < 0.05$ , \*\* $p < 0.01$ , \*\*\* $p < 0.001$ , \*\*\*\* $p < 0.0001$

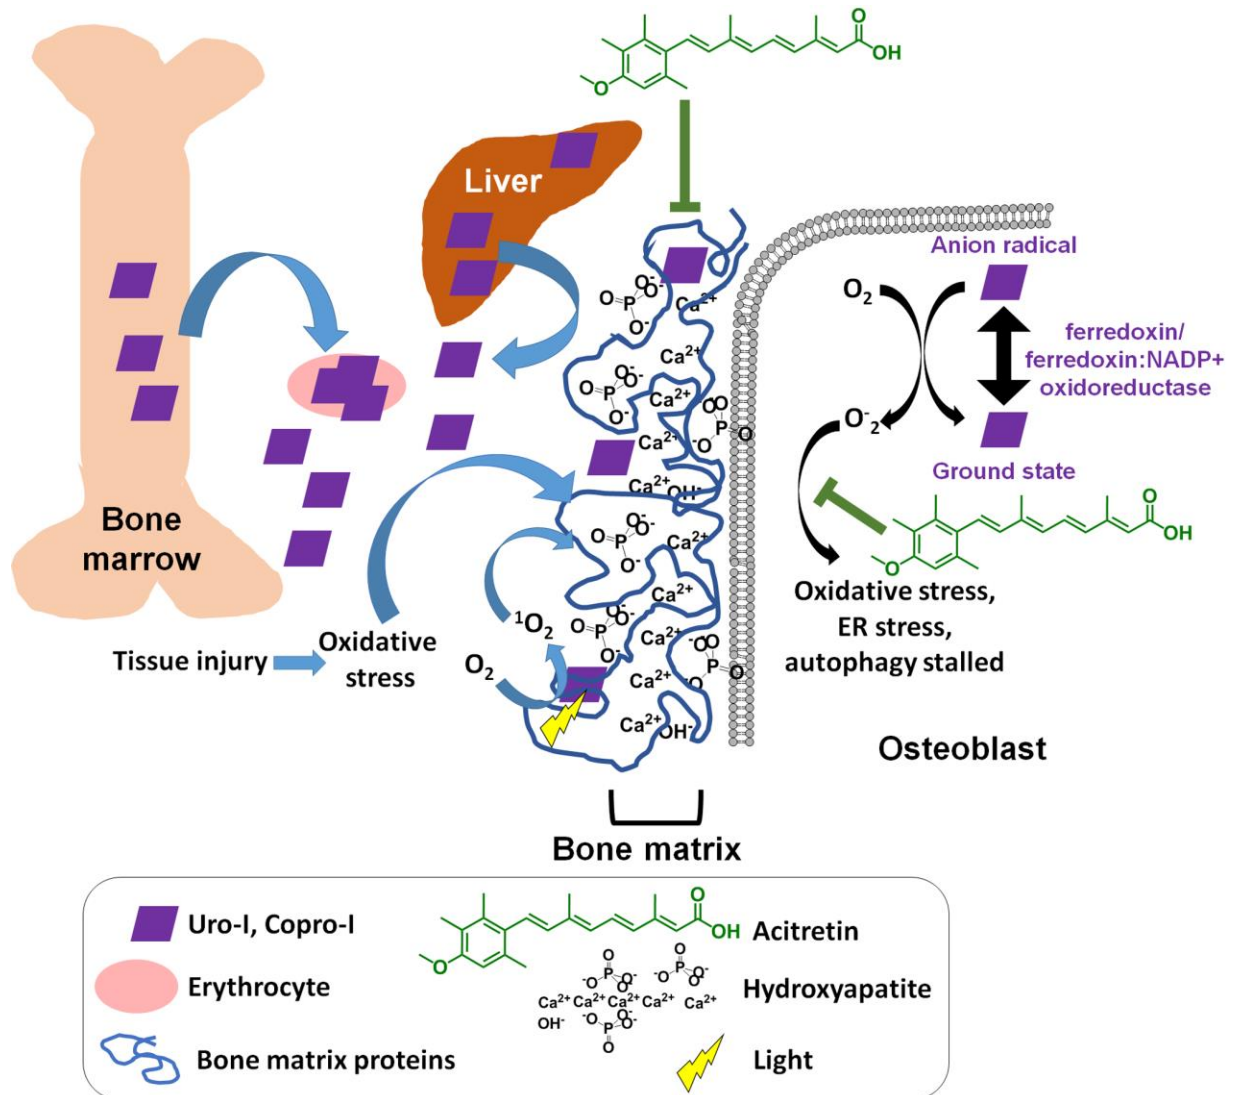

540

541 **Figure 4. Proposed model of CEP pathogenesis**

542 UROS inhibition leads to production of uro/copro-I mostly in erythrocytes and liver, which is  
 543 transported through blood to the bones. Uro-I causes bone damage by binding to  
 544 hydroxyapatite, causing oxidative and ER stress, protein aggregation and stalled autophagy.  
 545 Acitretin partially rescues uro-I-induced bone damage by reducing oxidative and ER stress and  
 546 restoring autophagic flux.

547



548 **SUPPLEMENTARY FIGURES**

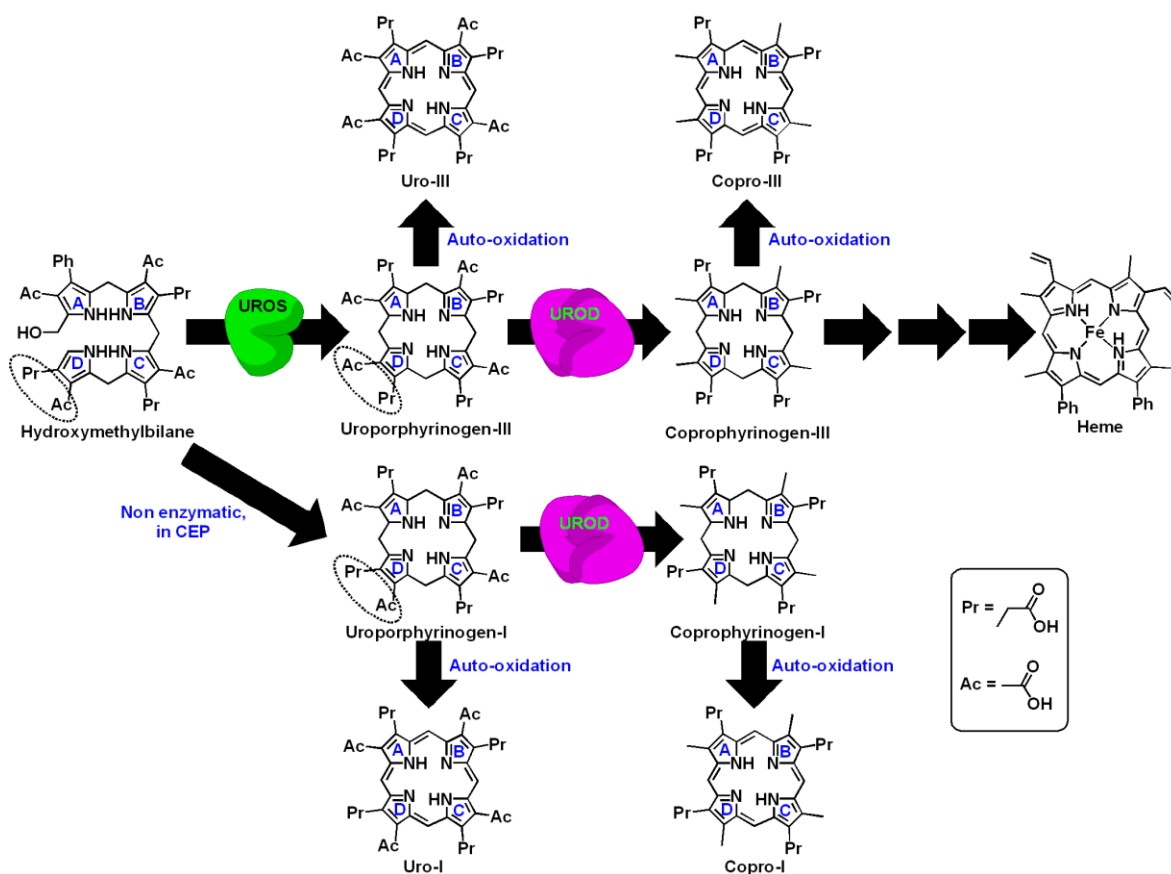

549  
550 **Figure S1. Uroporphyrinogen III synthase (UROS) inhibition accumulates uro-I and copro-**  
551 **I in CEP.**

552 UROS, a cytosolic enzyme, catalyzes the conversion of the linear tetrapyrrole,  
553 hydromethylbilane (HMB) to the first cyclic tetrapyrrole of the pathway, uroporphyrinogen-III<sup>1,2</sup>.  
554 UROS ‘flips’ the position of the acetate and propionate in the ‘D’ pyrrole ring and subsequently  
555 causes ring closure to form uroporphyrinogen-III (dotted oval)<sup>1,3</sup>. Uroporphyrinogen-III is  
556 decarboxylated by uroporphyrinogen decarboxylase (UROD) to form coproporphyrinogen-III,  
557 which through a multi-step mechanism that involves the formation of protoporphyrin-IX,  
558 generates heme. In absence of UROS activity, there is spontaneous ring closure of HMB to  
559 form uroporphyrinogen-I, a positional isomer of uroporphyrinogen-III, where the  
560 acetate/propionate inversion in ring ‘D’ does not occur. Uroporphyrinogen-I is decarboxylated by  
561 UROD to coproporphyrinogen-I, but after this step the pathway gets blocked since  
562 coproporphyrinogen-I cannot be metabolized by coproporphyrinogen oxidase. Porphyrinogens  
563 are relatively unstable compounds, and are auto-oxidized from their colorless, non-fluorescent  
564 porphyrinogen forms to colored, fluorescent porphyrins<sup>4</sup>. Thus UROS blockade leads to  
565 accumulation of uroporphyrin-I (uro-I) and coproporphyrin-I (copro-I).

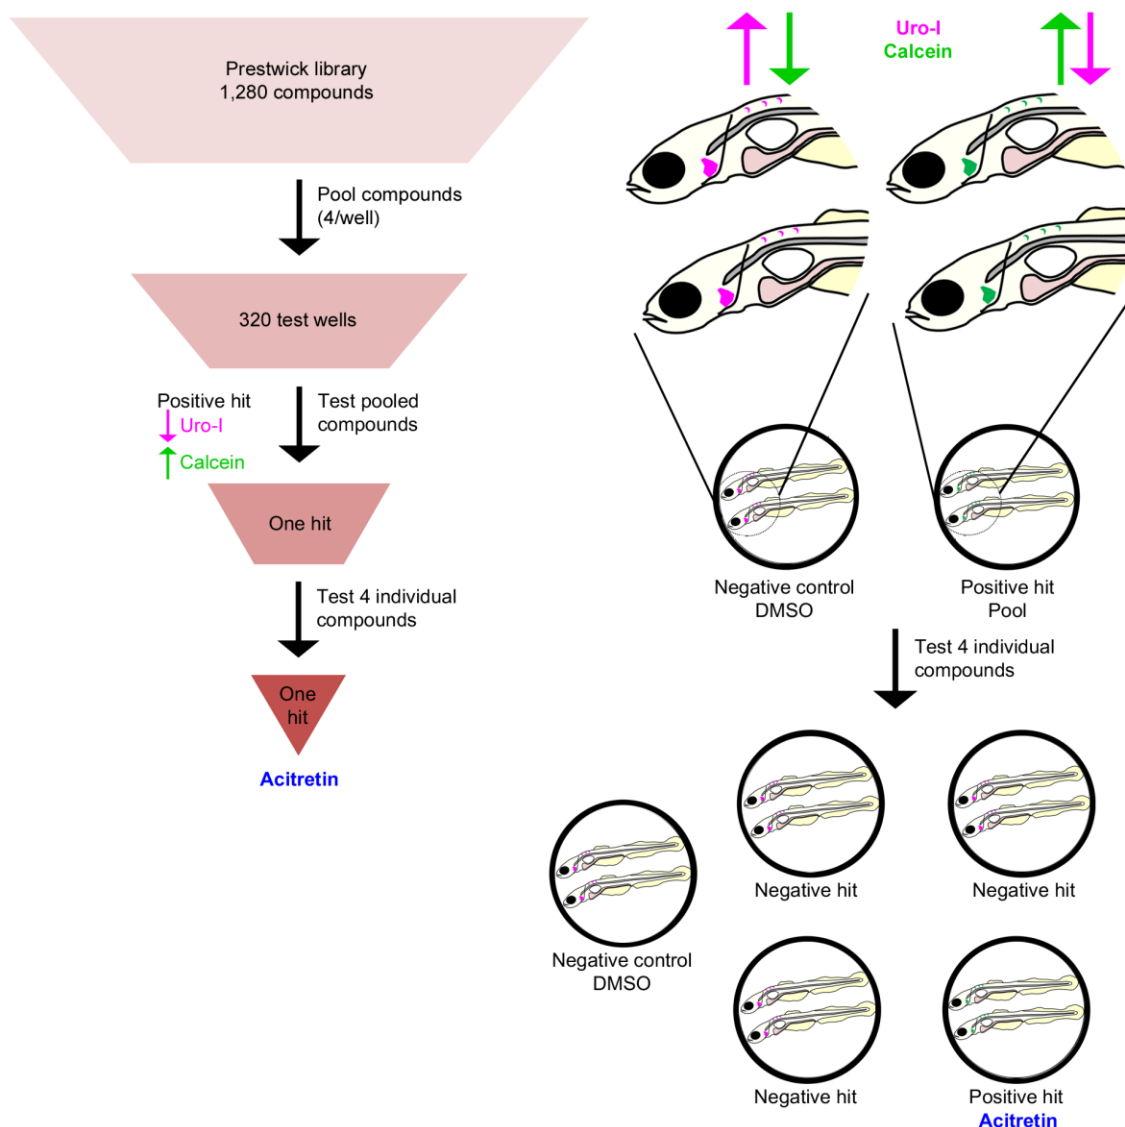

566

567 **Figure S2. High throughput drug screening for CEP.**

568 High throughput drug screening protocol to identify potential drug treatments for CEP was  
569 conducted by testing 1,280 small molecules from the commercially available Prestwick library.  
570 Initial screening was performed by pooling four drugs per well, with two zebrafish larvae in each  
571 well. 6dpf zebrafish larvae were injected with uro-I and calcein simultaneously. 24h later, they  
572 were imaged by epifluorescence microscopy using the automated ImageXpress system. Visual  
573 analysis was conducted and identification of wells containing larvae with reduced uro-I and  
574 increased calcein signal (magenta and green arrows, respectively) in bones compared to  
575 DMSO-treated larvae were selected for individual testing of each drug. Of the 320 pools tested,  
576 one was identified as potential hit. Once the four drugs were tested individually, acitretin was  
577 identified for decreasing uro-I accumulation in bones.

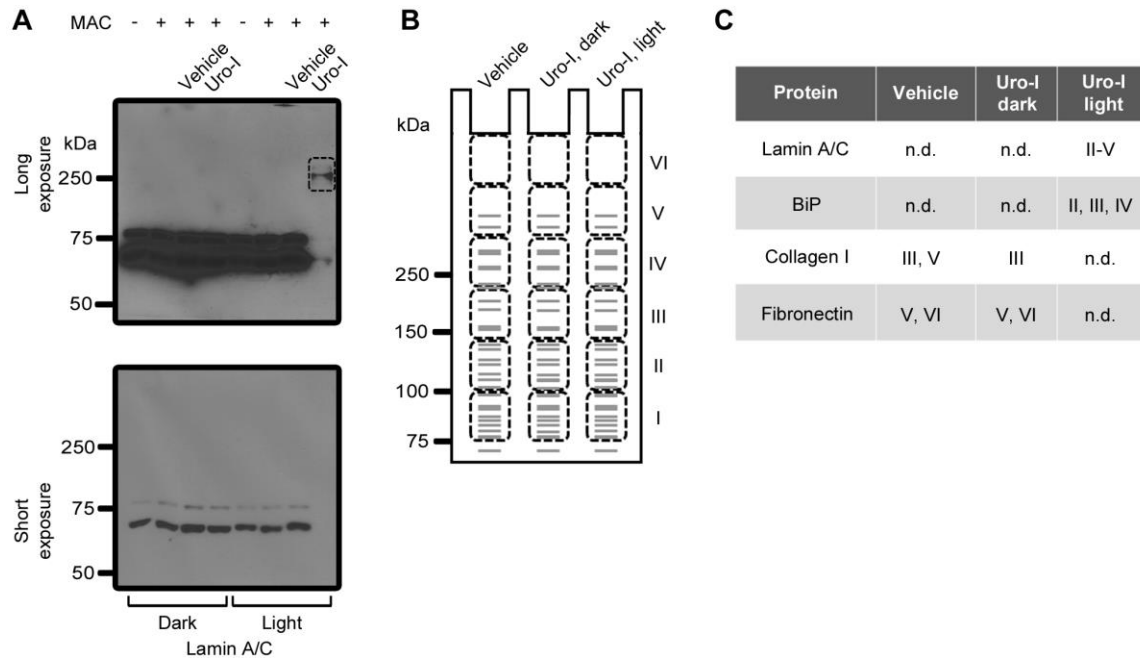

578

579 **Figure S3. Uro-I causes aggregation of bone matrix proteins in a light-independent**  
 580 **manner.**

581 **(A)** Saos-2 cells were treated for three days with uro-I or vehicle in the presence of  
 582 mineralization activation cocktail (MAC). Cells grown in medium without MAC (no mineralization  
 583 stimuli) and in MAC alone were used as controls for MAC efficiency. Experiments were  
 584 performed in a dark room and cells were shielded from light throughout the whole experiment. In  
 585 order to verify whether protein aggregation took place while cells were alive and represented a  
 586 biologically relevant finding, or if aggregation was an artifact of light exposure during processing  
 587 of samples, an aliquot of lysate from uro-I treated cells was exposed to light prior to addition of  
 588 reducing SDS-PAGE sample buffer, which we have shown previously that prevents light-  
 589 induced protein aggregation by porphyrins in cell lysate. Uro-I treatment did not cause lamin A/C  
 590 to aggregate, with monomer being comparable between vehicle- and uro-I treated cells (3<sup>rd</sup> and  
 591 4<sup>th</sup> lanes, short exposure). However, upon light exposure of the uro-I treated cells lysate, loss of  
 592 monomer and high molecular aggregates were observed (7<sup>th</sup> and 8<sup>th</sup> lanes, long exposure).  
 593 These findings confirm that accidental light exposure of samples did not happen, and any  
 594 protein aggregation observed was a true biological event, not an artifact of cell processing. **(B)**  
 595 We conducted a proteomics experiment of cell lysates treated with uro-I and vehicle in the dark  
 596 to further confirm our findings that bone matrix proteins aggregated upon uro-I treatment. Six  
 597 1cm regions of a coomassie stained gel (I-IV, cartoon) spanning from the bottom of the well to  
 598 slightly above the 75kDa marker were cut and submitted to mass spectrometry analysis. **(C)** Our

599 results confirmed lamin A/C aggregated only in the light-exposed uro-I treated cells lysate, but  
600 not in vehicle or uro-I treated cells lysate processed in the dark. Furthermore, data revealed that  
601 BiP only aggregated as an artifact of light exposure, not in living cells. Lamin A/C and BiP  
602 monomers were not detected in the mass spectral analysis because the gel blocks cut did not  
603 include the region where lamin A/C and BiP monomers migrate. Lastly, collagen type I alpha I  
604 chain and fibronectin were less abundant in uro-I treated cells lysate processed in the dark  
605 compared to control (data not shown). Interestingly, there was no collagen or fibronectin  
606 detected in the light processed cell lysate. This confirms that loss of monomer is a reliable read  
607 out for protein aggregation and that bone matrix proteins are likely forming high molecular  
608 weight aggregates that are unable to migrate into the gel.

609

#### 610 **SUPPLEMENTARY REFERENCES**

- 611 1 Ajioka, R. S., Phillips, J. D. and Kushner, J. P. (2006). Biosynthesis of heme in  
612 mammals. *Biochimica et Biophysica Acta (BBA) - Molecular Cell Research* 1763, 723-736.
- 613 2 Layer, G., Reichelt, J., Jahn, D. and Heinz, D. W. (2010). Structure and function of  
614 enzymes in heme biosynthesis. *Protein Sci* 19, 1137-61.
- 615 3 Phillips, J. D., Whitby, F. G., Kushner, J. P. and Hill, C. P. (2003). Structural basis for  
616 tetrapyrrole coordination by uroporphyrinogen decarboxylase. *EMBO J* 22, 6225-33.
- 617 4 Badminton, M. N. and Elder, G. H. (2014). CHAPTER 28 - The porphyrias: inherited  
618 disorders of haem synthesis. In *Clinical Biochemistry: Metabolic and Clinical Aspects* (Third  
619 Edition), (eds W. J. Marshall M. Lapsley A. P. Day and R. M. Ayling), pp. 533-549: Churchill  
620 Livingstone.
